# Supplementary material for: Inorganic–organic {dz2-MIIS4}⋯π-hole stacking in reverse sandwich structures: the case of cocrystals of group 10 metal dithiocarbamates with electron-deficient arenes
Source: Royal Society of Chemistry journal article supplement (doi:10.1039/d2qi00438k), 2022-01-01
Supplement: d2qi00438k1.pdf [file d2qi00438k1.pdf]

## Electronic Supporting Information

### **Organic–Inorganic $\{d_z^2\text{-M}^{\text{II}}\text{S}_4\} \cdots \pi$ -Hole Stacking in Reverse Sandwich Structures. The Case of Cocrystals of Group 10 Metal Dithiocarbamates with Electron-deficient Arenes**

Lev E. Zelenkov,<sup>1,2</sup> Anastasiya A. Eliseeva,<sup>1</sup> Sergey V. Baykov,<sup>1,3</sup> Daniil M. Ivanov,<sup>1,3</sup>

Alina I. Sumina,<sup>1</sup> Rosa M. Gomila,<sup>4</sup> Antonio Frontera,<sup>4</sup> Vadim Yu. Kukushkin,<sup>1,5</sup>

Nadezhda A. Bokach\*<sup>1,3</sup>

<sup>1</sup>*Institute of Chemistry, Saint Petersburg State University, Universitetskaya Nab. 7/9,*

*Saint Petersburg, 199034 Russian Federation*

<sup>2</sup>*ITMO University, Saint Petersburg, 191002 Russian Federation*

<sup>3</sup>*Research School of Chemistry and Applied Biomedical Sciences, Tomsk Polytechnic University, Tomsk, 634034 Russian Federation*

<sup>4</sup>*Departament de Química, Universitat de les Illes Balears, Crta de Valldemoss km 7.5, 07122 Palma de Mallorca (Balears), Spain*

<sup>5</sup>*Laboratory of Crystal Engineering of Functional Materials, South Ural State University, 76, Lenin Av., Chelyabinsk, 454080, Russian Federation*

## Crystallographic data

**Table S1.** Crystallographic data and structure refinement for (1–3)·2(FXB)

|                                             |                                                                                               |                                                                                                |                                                                                                |                                                                                                |
|---------------------------------------------|-----------------------------------------------------------------------------------------------|------------------------------------------------------------------------------------------------|------------------------------------------------------------------------------------------------|------------------------------------------------------------------------------------------------|
| Identification code                         | 2154457                                                                                       | 2154459                                                                                        | 2154460                                                                                        | 2154461                                                                                        |
| Empirical formula                           | C <sub>22</sub> H <sub>20</sub> F <sub>8</sub> I <sub>4</sub> N <sub>2</sub> NiS <sub>4</sub> | C <sub>22</sub> H <sub>20</sub> Br <sub>4</sub> F <sub>8</sub> N <sub>2</sub> NiS <sub>4</sub> | C <sub>22</sub> H <sub>20</sub> Br <sub>4</sub> F <sub>8</sub> N <sub>2</sub> PdS <sub>4</sub> | C <sub>22</sub> H <sub>20</sub> Br <sub>4</sub> F <sub>8</sub> N <sub>2</sub> PtS <sub>4</sub> |
| Formula weight                              | 1158.95                                                                                       | 970.99                                                                                         | 1018.68                                                                                        | 1107.37                                                                                        |
| Temperature/K                               | 100(2)                                                                                        | 100(2)                                                                                         | 100(2)                                                                                         | 100(2)                                                                                         |
| Crystal system                              | triclinic                                                                                     | triclinic                                                                                      | triclinic                                                                                      | triclinic                                                                                      |
| Space group                                 | P-1                                                                                           | P-1                                                                                            | P-1                                                                                            | P-1                                                                                            |
| a/Å                                         | 9.0182(4)                                                                                     | 8.74100(10)                                                                                    | 8.7298(4)                                                                                      | 8.7387(4)                                                                                      |
| b/Å                                         | 9.8168(4)                                                                                     | 9.84550(10)                                                                                    | 9.8777(4)                                                                                      | 9.8957(4)                                                                                      |
| c/Å                                         | 10.6040(4)                                                                                    | 10.30690(10)                                                                                   | 10.3215(5)                                                                                     | 10.3014(4)                                                                                     |
| $\alpha$ /°                                 | 63.185(4)                                                                                     | 62.8630(10)                                                                                    | 62.687(5)                                                                                      | 62.813(4)                                                                                      |
| $\beta$ /°                                  | 75.649(4)                                                                                     | 74.5770(10)                                                                                    | 75.031(4)                                                                                      | 74.676(4)                                                                                      |
| $\gamma$ /°                                 | 78.926(4)                                                                                     | 79.9300(10)                                                                                    | 80.935(4)                                                                                      | 81.315(4)                                                                                      |
| Volume/Å <sup>3</sup>                       | 808.17(7)                                                                                     | 759.454(16)                                                                                    | 763.17(7)                                                                                      | 763.75(6)                                                                                      |
| Z                                           | 1                                                                                             | 1                                                                                              | 1                                                                                              | 1                                                                                              |
| $\rho_{\text{calc}}$ /g/cm <sup>3</sup>     | 2.381                                                                                         | 2.123                                                                                          | 2.216                                                                                          | 2.408                                                                                          |
| $\mu$ /mm <sup>-1</sup>                     | 4.743                                                                                         | 10.292                                                                                         | 14.230                                                                                         | 10.166                                                                                         |
| F(000)                                      | 542.0                                                                                         | 470.0                                                                                          | 488.0                                                                                          | 520.0                                                                                          |
| Crystal size/mm <sup>3</sup>                | 0.18 × 0.16 × 0.12                                                                            | 0.14 × 0.13 × 0.1                                                                              | 0.16 × 0.15 × 0.1                                                                              | 0.12 × 0.1 × 0.08                                                                              |
| Radiation                                   | Mo K $\alpha$ ( $\lambda$ = 0.71073)                                                          | Cu K $\alpha$ ( $\lambda$ = 1.54184)                                                           | Cu K $\alpha$ ( $\lambda$ = 1.54184)                                                           | Mo K $\alpha$ ( $\lambda$ = 0.71073)                                                           |
| 2 $\theta$ range for data collection/°      | 5.794 to 51.996                                                                               | 9.868 to 124.946                                                                               | 9.87 to 140.832                                                                                | 5.864 to 51.994                                                                                |
| Index ranges                                | -11 ≤ h ≤ 11, -12 ≤ k ≤ 12, -13 ≤ l ≤ 13                                                      | -9 ≤ h ≤ 10, -10 ≤ k ≤ 11, -11 ≤ l ≤ 11                                                        | -10 ≤ h ≤ 10, -12 ≤ k ≤ 10, -12 ≤ l ≤ 12                                                       | -10 ≤ h ≤ 10, -12 ≤ k ≤ 12, -12 ≤ l ≤ 12                                                       |
| Reflections collected                       | 11548                                                                                         | 7889                                                                                           | 12792                                                                                          | 11363                                                                                          |
| Independent reflections                     | 3164 [R <sub>int</sub> = 0.0258, R <sub>sigma</sub> = 0.0232]                                 | 2337 [R <sub>int</sub> = 0.0347, R <sub>sigma</sub> = 0.0243]                                  | 2890 [R <sub>int</sub> = 0.0499, R <sub>sigma</sub> = 0.0403]                                  | 2993 [R <sub>int</sub> = 0.0417, R <sub>sigma</sub> = 0.0385]                                  |
| Data/restraints/parameters                  | 3164/0/189                                                                                    | 2337/0/189                                                                                     | 2890/0/189                                                                                     | 2993/0/189                                                                                     |
| Goodness-of-fit on F <sup>2</sup>           | 1.068                                                                                         | 1.088                                                                                          | 1.087                                                                                          | 1.057                                                                                          |
| Final R indexes [I ≥ 2 $\sigma$ (I)]        | R <sub>1</sub> = 0.0180, wR <sub>2</sub> = 0.0421                                             | R <sub>1</sub> = 0.0315, wR <sub>2</sub> = 0.0833                                              | R <sub>1</sub> = 0.0340, wR <sub>2</sub> = 0.0903                                              | R <sub>1</sub> = 0.0272, wR <sub>2</sub> = 0.0641                                              |
| Final R indexes [all data]                  | R <sub>1</sub> = 0.0205, wR <sub>2</sub> = 0.0434                                             | R <sub>1</sub> = 0.0322, wR <sub>2</sub> = 0.0840                                              | R <sub>1</sub> = 0.0376, wR <sub>2</sub> = 0.0930                                              | R <sub>1</sub> = 0.0326, wR <sub>2</sub> = 0.0672                                              |
| Largest diff. peak/hole / e Å <sup>-3</sup> | 0.64/-0.64                                                                                    | 0.60/-0.83                                                                                     | 0.78/-1.14                                                                                     | 2.42/-1.42                                                                                     |



**Table S2.** Distances for (plane) $\pi_{\text{ArF}}\cdots\text{M}$ , (plane) $\pi_{\text{ArF}}\cdots\text{S}$ , and (plane) $\pi_{\text{ArF}}\cdots(\text{plane})_{\text{MS4}}$  and (plane) $\pi_{\text{ArF}}\cdots(\text{plane})_{\pi_{\text{ArF}}}$  contacts in the structures of (1–3)·2(FXB), Å.

| contact                                  | 1·2(FBrB)  | 1·2(FIB)   | 2·2(FBrB)  | 3·2(FBrB)  |
|------------------------------------------|------------|------------|------------|------------|
| $\pi_{\text{ArF}}\cdots\text{M}$         | 3.4299(11) | 3.4879(11) | 3.4293(15) | 3.4396(18) |
| $\pi_{\text{ArF}}\cdots\text{S}$         | 3.327(3)   | 3.337(3)   | 3.319(4)   | 3.328(4)   |
| $\pi_{\text{ArF}}\cdots\text{S}$         | 3.538(2)   | 3.635(2)   | 3.531(3)   | 3.539(4)   |
| $\pi_{\text{ArF}}\cdots\pi_{\text{ArF}}$ | 3.4710(2)  | 3.558(3)   | 3.475(3)   | 3.469(4)   |

**Table S3.** Halogen bonds in the structures of (1–3)·2(FXB).

| contact                    | X $\cdots$ Y<br>distance, Å | Nc <sup>a</sup> | C–X $\cdots$ Y angle, ° | X $\cdots$ Y–Z angle, ° |
|----------------------------|-----------------------------|-----------------|-------------------------|-------------------------|
| <b>1·2(FBrB)</b>           |                             |                 |                         |                         |
| C1S–Br1S $\cdots$ S1–Ni1   | 3.6033(11)                  | 0.99            | 175.01(8)               | 153.25(3)               |
| C2S–Br2S $\cdots$ Br2S–C2S | 3.5655(6)                   | 0.96            | 148.49(8)               | 148.49(8)               |
| C2S–Br2S $\cdots$ F3S–C5S  | 3.2544(17)                  | 0.98            | 141.56(8)               | 140.17(14)              |
| <b>1·2(FIB)</b>            |                             |                 |                         |                         |
| C1S–I1S $\cdots$ S1–Ni1    | 3.5605(9)                   | 0.94            | 171.75(7)               | 150.35(3)               |
| C2S–I2S $\cdots$ I2S–C2S   | 3.7734(4)                   | 0.95            | 146.91(7)               | 146.91(7)               |
| C2S–I2S $\cdots$ F3S–C5S   | 3.2967(16)                  | 0.96            | 144.07(7)               | 140.86(14)              |
| <b>2·2(FBrB)</b>           |                             |                 |                         |                         |
| C1S–Br1S $\cdots$ S1–Pd1   | 3.5571(14)                  | 0.97            | 174.99(11)              | 150.61(4)               |
| C2S–Br2S $\cdots$ Br2S–C2S | 3.5576(7)                   | 0.96            | 149.21(11)              | 149.21(11)              |
| C2S–Br2S $\cdots$ F3S–C5S  | 3.256(3)                    | 0.98            | 140.89(11)              | 139.6(2)                |
| <b>3·2(FBrB)</b>           |                             |                 |                         |                         |
| C1S–Br1S $\cdots$ S1–Pt1   | 3.5571(17)                  | 0.97            | 174.86(16)              | 150.12(5)               |

|                   |           |      |            |            |
|-------------------|-----------|------|------------|------------|
| C2S–Br2S⋯Br2S–C2S | 3.5532(8) | 0.96 | 148.89(13) | 148.89(13) |
| C2S–Br2S⋯F3S–C5S  | 3.257(3)  | 0.98 | 141.26(14) | 139.9(2)   |

<sup>a</sup>The Normalized contact (Nc) is defined as the ratio between the separation observed in the crystal and the sum of Bondi vdW radii of interacting atoms:  $Nc = d/\Sigma_{vdW}$ ;  $\Sigma_{vdW}(Br+S) = 3.65 \text{ \AA}$ ,  $\Sigma_{vdW}(Br+Br) = 3.70 \text{ \AA}$ ,  $\Sigma_{vdW}(Br+F) = 3.32 \text{ \AA}$ ,  $\Sigma_{vdW}(I+S) = 3.78 \text{ \AA}$ ,  $\Sigma_{vdW}(I+I) = 3.96 \text{ \AA}$ ,  $\Sigma_{vdW}(I+F) = 3.45 \text{ \AA}$ .

**Table S3.** Hydrogen bonds in the structures of (1–3)·2(FXB),  $\text{\AA}$ .

| contact          | H⋯Y<br>distance, $\text{\AA}$ | Nc <sup>a</sup> | C⋯Y distance,<br>$\text{\AA}$ | C–H⋯Y angle, ° |
|------------------|-------------------------------|-----------------|-------------------------------|----------------|
| <b>1·2(FBrB)</b> |                               |                 |                               |                |
| C2–H2A⋯F4S       | 2.5055(17)                    | 0.94            | 3.467(3)                      | 170.90(18)     |
| C3–H3C⋯F3S       | 2.662(2)                      | 1.0             | 3.421(4)                      | 136.29(15)     |
| C2–H2B⋯Br1S      | 3.0153(4)                     | 0.99            | 3.813(4)                      | 140.3(2)       |
| <b>1·2(FIB)</b>  |                               |                 |                               |                |
| C2–H2B⋯F4S       | 2.5888(16)                    | 0.97            | 3.551(3)                      | 171.5(2)       |
| C3–H3B⋯F1S       | 2.5902(17)                    | 0.97            | 3.361(3)                      | 137.5(2)       |
| C2–H2A⋯I1S       | 3.1268(3)                     | 0.98            | 3.943(3)                      | 142.74(18)     |
| <b>2·2(FBrB)</b> |                               |                 |                               |                |
| C2–H2A⋯F4S       | 2.485(3)                      | 0.93            | 3.463(5)                      | 169.0(3)       |
| C3–H3C⋯F3S       | 2.629(3)                      | 0.98            | 3.401(6)                      | 135.8(2)       |
| C2–H2B⋯Br1S      | 3.0094(5)                     | 0.99            | 3.822(5)                      | 140.2(3)       |
| <b>3·2(FBrB)</b> |                               |                 |                               |                |
| C2–H2B⋯F4S       | 2.504(3)                      | 0.94            | 3.460(5)                      | 168.7(3)       |
| C3–H3A⋯F3S       | 2.642(3)                      | 0.99            | 3.399(7)                      | 136.1(3)       |
| C2–H2A⋯Br1S      | 3.0333(6)                     | 0.99            | 3.832(6)                      | 140.5(3)       |

<sup>a</sup> $Nc = d/\Sigma_{vdW}$ ;  $\Sigma_{vdW}(H+F) = 2.67 \text{ \AA}$ ,  $\Sigma_{vdW}(H+Br) = 3.05 \text{ \AA}$ ,  $\Sigma_{vdW}(H+I) = 3.32 \text{ \AA}$ .

## Computational details

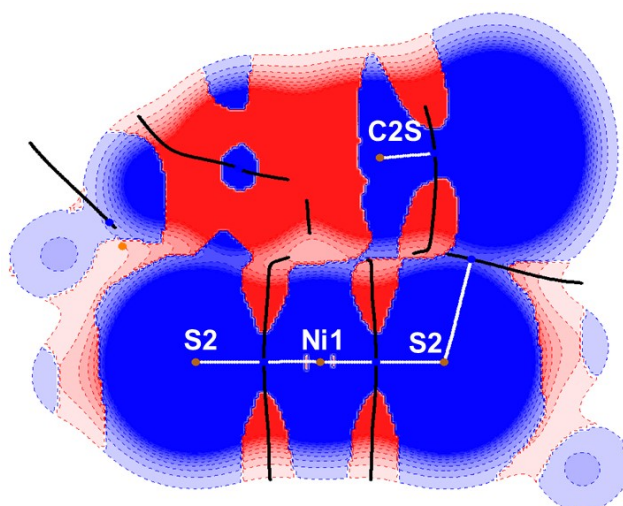

**Figure S1.** Projection of  $\text{sign}(\lambda_2)\rho(\mathbf{r})$  defined by three atoms (S2, C2S, S2) along the C2S···Ni1 bond path in **1·(FIB)**.

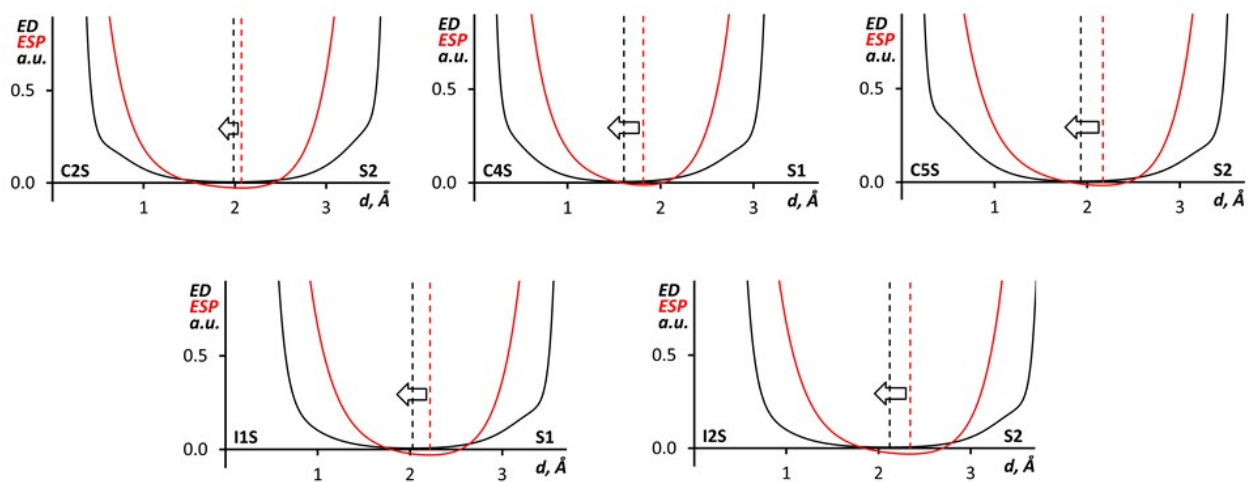

**Figure S2.** The ED (black) and ESP (red) 1D profiles along the C···S (*top*) and I···S (*bottom*) bond paths for **1·(FIB)**.

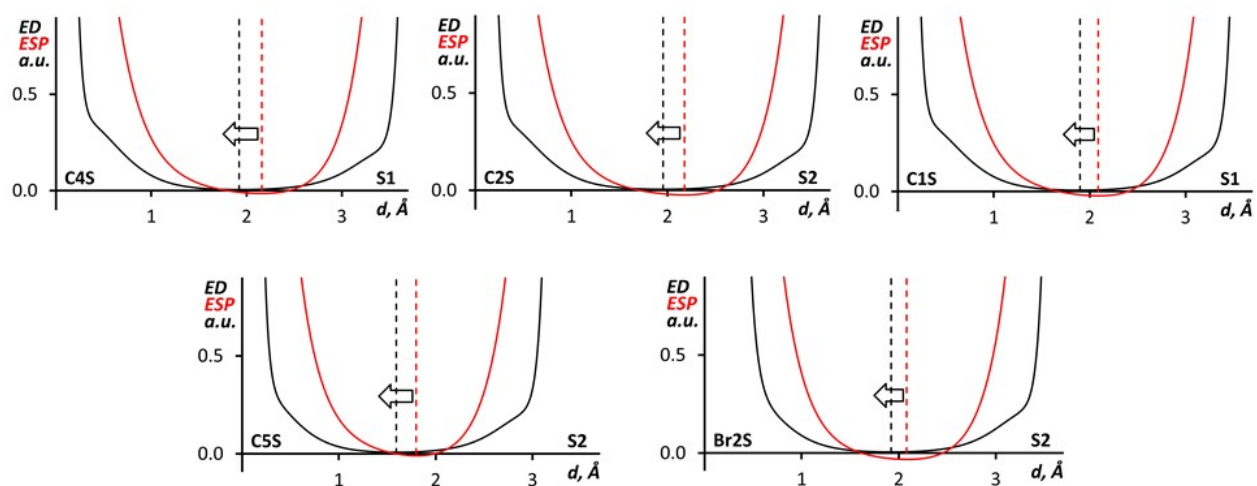

**Figure S3.** The ED (black) and ESP (red) 1D profiles along the C...S and Br...S bond paths for 1·(FBrB).

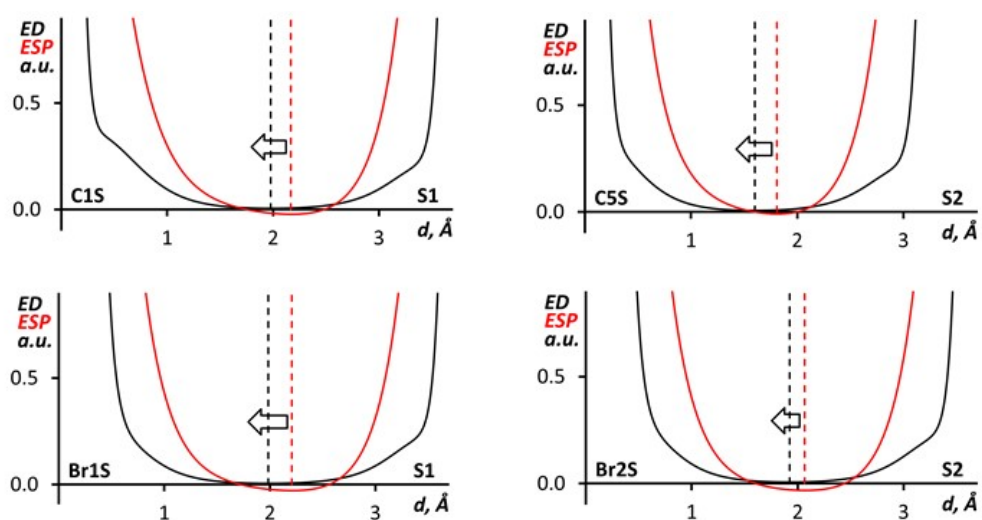

**Figure S4.** The ED (black) and ESP (red) 1D profiles along the C...S (*top*) and Br...S (*bottom*) bond paths for 2·(FBrB).

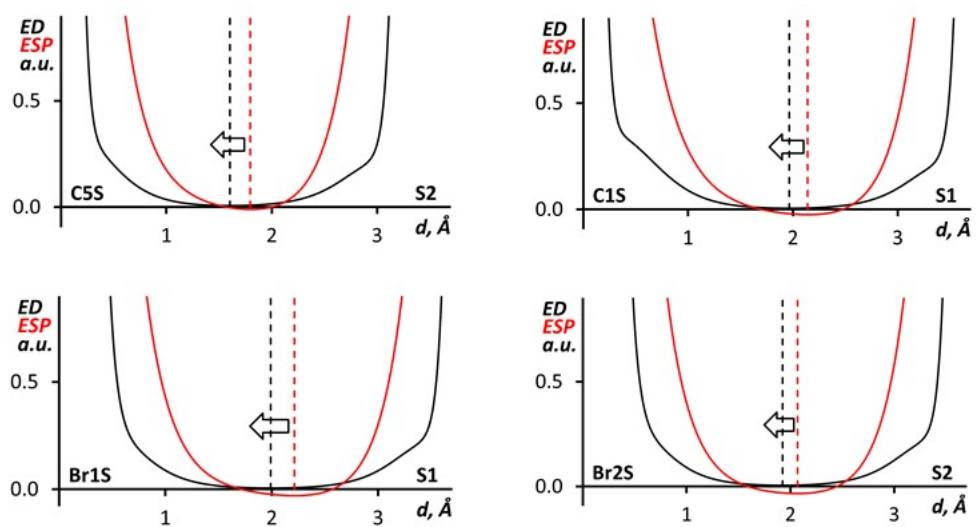

**Figure S5.** The ED (black) and ESP (red) 1D profiles along the C $\cdots$ S (*top*) and Br $\cdots$ S (*bottom*) bond paths for  $3\cdot(\text{FBrB})$ .



## Cartesian Coordinates

### Dimers of Fig. 6

#### 1·FBrB

|    |             |             |             |
|----|-------------|-------------|-------------|
| Br | 7.53830000  | 8.85240000  | 6.94100000  |
| Br | 9.63840000  | 6.54700000  | 5.57770000  |
| F  | 3.82410000  | 5.32220000  | 6.30290000  |
| F  | 5.50270000  | 3.47280000  | 5.23070000  |
| F  | 4.75840000  | 7.71450000  | 7.07790000  |
| F  | 8.10590000  | 4.06220000  | 4.88030000  |
| C  | 5.61240000  | 6.83500000  | 6.53840000  |
| C  | 6.95590000  | 7.16040000  | 6.37970000  |
| C  | 5.12200000  | 5.60180000  | 6.14490000  |
| C  | 5.97070000  | 4.67000000  | 5.59550000  |
| C  | 7.80830000  | 6.21740000  | 5.81690000  |
| C  | 7.30620000  | 4.98070000  | 5.43240000  |
| Ni | 8.83300000  | 13.98180000 | 8.96280000  |
| S  | 6.66520000  | 14.11660000 | 9.36840000  |
| S  | 8.71720000  | 15.97650000 | 9.90420000  |
| N  | 6.14350000  | 16.48340000 | 10.56900000 |
| C  | 7.02360000  | 15.66490000 | 10.03120000 |
| C  | 7.01240000  | 17.58170000 | 12.59900000 |
| H  | 7.75400000  | 16.97210000 | 12.62770000 |
| H  | 6.28670000  | 17.22650000 | 13.11710000 |
| H  | 7.27980000  | 18.42900000 | 12.96200000 |
| C  | 4.70320000  | 16.16500000 | 10.60030000 |
| H  | 4.32070000  | 16.48630000 | 11.43210000 |
| H  | 4.58540000  | 15.20250000 | 10.56810000 |
| C  | 6.56490000  | 17.76530000 | 11.16140000 |
| H  | 5.82630000  | 18.39350000 | 11.13090000 |
| H  | 7.29500000  | 18.13710000 | 10.64160000 |
| C  | 3.97130000  | 16.80010000 | 9.43160000  |
| H  | 4.29600000  | 16.42630000 | 8.60970000  |
| H  | 4.12470000  | 17.74800000 | 9.43520000  |
| H  | 3.03030000  | 16.62840000 | 9.51220000  |
| S  | 11.00080000 | 13.84700000 | 8.55730000  |
| S  | 8.94890000  | 11.98710000 | 8.02150000  |
| N  | 11.52260000 | 11.48010000 | 7.35670000  |
| C  | 10.64250000 | 12.29870000 | 7.89450000  |
| C  | 10.65370000 | 10.38190000 | 5.32660000  |
| H  | 9.91210000  | 10.99150000 | 5.29790000  |
| H  | 11.37940000 | 10.73700000 | 4.80860000  |
| H  | 10.38630000 | 9.53450000  | 4.96360000  |
| C  | 12.96290000 | 11.79860000 | 7.32530000  |
| H  | 13.34540000 | 11.47720000 | 6.49360000  |
| H  | 13.08060000 | 12.76110000 | 7.35760000  |
| C  | 11.10110000 | 10.19820000 | 6.76420000  |
| H  | 11.83980000 | 9.57010000  | 6.79470000  |
| H  | 10.37110000 | 9.82650000  | 7.28410000  |
| C  | 13.69480000 | 11.16350000 | 8.49410000  |
| H  | 13.37010000 | 11.53730000 | 9.31600000  |
| H  | 13.54140000 | 10.21560000 | 8.49050000  |
| H  | 14.63570000 | 11.33520000 | 8.41340000  |

#### 1·FIB

|    |             |            |            |
|----|-------------|------------|------------|
| Ni | 6.76610000  | 6.99700000 | 4.65100000 |
| S  | 6.89750000  | 5.01150000 | 3.69090000 |
| S  | 8.93970000  | 6.84720000 | 4.31350000 |
| N  | 9.48290000  | 4.51980000 | 3.05940000 |
| C  | 9.09030000  | 3.24240000 | 2.43060000 |
| H  | 8.33630000  | 2.86620000 | 2.91060000 |
| H  | 9.82750000  | 2.61510000 | 2.49020000 |
| C  | 10.92080000 | 4.84900000 | 3.05480000 |
| H  | 11.03060000 | 5.81280000 | 3.07620000 |
| H  | 11.32420000 | 4.51870000 | 2.23710000 |
| C  | 8.59290000  | 5.32030000 | 3.59990000 |

|   |             |             |            |
|---|-------------|-------------|------------|
| C | 11.62750000 | 4.23230000  | 4.25290000 |
| H | 12.57270000 | 4.39180000  | 4.18410000 |
| H | 11.46300000 | 3.28680000  | 4.27060000 |
| H | 11.29490000 | 4.63000000  | 5.06030000 |
| C | 8.71240000  | 3.44310000  | 0.97210000 |
| H | 9.47640000  | 3.75850000  | 0.48370000 |
| H | 8.00420000  | 4.08730000  | 0.90970000 |
| H | 8.41840000  | 2.60780000  | 0.60000000 |
| S | 6.63460000  | 8.98250000  | 5.61120000 |
| S | 4.59240000  | 7.14680000  | 4.98850000 |
| N | 4.04920000  | 9.47420000  | 6.24260000 |
| C | 4.44180000  | 10.75160000 | 6.87140000 |
| H | 5.19580000  | 11.12780000 | 6.39140000 |
| H | 3.70460000  | 11.37880000 | 6.81190000 |
| C | 2.61130000  | 9.14500000  | 6.24720000 |
| H | 2.50150000  | 8.18120000  | 6.22580000 |
| H | 2.20790000  | 9.47520000  | 7.06490000 |
| C | 4.93920000  | 8.67370000  | 5.70210000 |
| C | 1.90460000  | 9.76160000  | 5.04910000 |
| H | 0.95940000  | 9.60220000  | 5.11800000 |
| H | 2.06910000  | 10.70710000 | 5.03150000 |
| H | 2.23720000  | 9.36390000  | 4.24170000 |
| C | 4.81970000  | 10.55080000 | 8.33000000 |
| H | 4.05570000  | 10.23540000 | 8.81830000 |
| H | 5.52790000  | 9.90660000  | 8.39230000 |
| H | 5.11370000  | 11.38610000 | 8.70210000 |
| I | 5.90780000  | 14.51540000 | 8.14240000 |
| I | 8.18310000  | 11.98720000 | 6.72980000 |
| F | 11.02330000 | 13.32720000 | 6.68030000 |
| F | 10.26020000 | 17.58150000 | 8.48120000 |
| F | 11.94090000 | 15.72640000 | 7.44210000 |
| F | 7.65040000  | 16.99550000 | 8.81130000 |
| C | 8.82030000  | 13.87580000 | 7.35420000 |
| C | 7.95400000  | 14.82720000 | 7.90210000 |
| C | 10.15170000 | 14.20700000 | 7.21000000 |
| C | 8.45980000  | 16.06250000 | 8.27880000 |
| C | 10.64570000 | 15.43840000 | 7.59050000 |
| C | 9.78980000  | 16.37440000 | 8.12810000 |

**2·FBrB**

|    |            |             |             |
|----|------------|-------------|-------------|
| Br | 7.40550000 | 8.93050000  | 6.93030000  |
| Br | 9.50350000 | 6.62360000  | 5.56870000  |
| F  | 4.62520000 | 7.78960000  | 7.08830000  |
| F  | 5.37190000 | 3.53470000  | 5.26000000  |
| F  | 3.69310000 | 5.39150000  | 6.31940000  |
| F  | 7.97250000 | 4.13080000  | 4.89430000  |
| C  | 5.48550000 | 6.90920000  | 6.54520000  |
| C  | 7.66170000 | 6.28870000  | 5.82280000  |
| C  | 7.17970000 | 5.05760000  | 5.43660000  |
| C  | 4.98760000 | 5.67430000  | 6.15710000  |
| C  | 6.81760000 | 7.23150000  | 6.38210000  |
| C  | 5.83810000 | 4.74260000  | 5.60680000  |
| Pd | 8.58720000 | 14.12490000 | 8.96240000  |
| S  | 6.31140000 | 14.32120000 | 9.41450000  |
| S  | 8.36760000 | 16.21920000 | 9.95570000  |
| N  | 5.78990000 | 16.68410000 | 10.59980000 |
| C  | 3.61580000 | 16.97670000 | 9.44360000  |
| H  | 3.97120000 | 16.60490000 | 8.60920000  |
| H  | 3.74400000 | 17.94790000 | 9.44900000  |
| H  | 2.65970000 | 16.77340000 | 9.51090000  |
| C  | 6.65400000 | 17.79070000 | 12.63690000 |
| H  | 7.41360000 | 17.17160000 | 12.66560000 |
| H  | 5.91610000 | 17.42790000 | 13.16930000 |
| H  | 6.92590000 | 18.65760000 | 13.00260000 |
| C  | 6.19830000 | 17.96940000 | 11.19130000 |
| H  | 5.43640000 | 18.60120000 | 11.16260000 |
| H  | 6.93750000 | 18.35650000 | 10.65890000 |
| C  | 4.35350000 | 16.35840000 | 10.63200000 |
| H  | 3.95880000 | 16.69710000 | 11.47450000 |
| H  | 4.23900000 | 15.37520000 | 10.61410000 |
| C  | 6.66810000 | 15.87340000 | 10.07550000 |

|   |             |             |            |
|---|-------------|-------------|------------|
| S | 10.86300000 | 13.92860000 | 8.51020000 |
| S | 8.80680000  | 12.03060000 | 7.96900000 |
| N | 11.38440000 | 11.56570000 | 7.32490000 |
| C | 13.55850000 | 11.27310000 | 8.48110000 |
| H | 13.20320000 | 11.64490000 | 9.31550000 |
| H | 13.43030000 | 10.30190000 | 8.47570000 |
| H | 14.51470000 | 11.47640000 | 8.41390000 |
| C | 10.52030000 | 10.45920000 | 5.28780000 |
| H | 9.76080000  | 11.07820000 | 5.25910000 |
| H | 11.25830000 | 10.82190000 | 4.75540000 |
| H | 10.24840000 | 9.59220000  | 4.92210000 |
| C | 10.97610000 | 10.28040000 | 6.73340000 |
| H | 11.73800000 | 9.64860000  | 6.76210000 |
| H | 10.23690000 | 9.89330000  | 7.26580000 |
| C | 12.82090000 | 11.89140000 | 7.29270000 |
| H | 13.21550000 | 11.55280000 | 6.45020000 |
| H | 12.93540000 | 12.87460000 | 7.31060000 |
| C | 10.50630000 | 12.37640000 | 7.84920000 |

### 3·FBrB

|    |             |             |             |
|----|-------------|-------------|-------------|
| Br | 5.53820000  | 5.19250000  | 2.01970000  |
| Br | 3.44010000  | 7.50390000  | 3.37680000  |
| F  | 9.25580000  | 8.72910000  | 2.62760000  |
| F  | 8.31970000  | 6.33650000  | 1.86550000  |
| F  | 4.97510000  | 9.99080000  | 4.05710000  |
| F  | 7.57390000  | 10.58990000 | 3.68990000  |
| C  | 5.26850000  | 7.82850000  | 3.12710000  |
| C  | 7.10770000  | 9.37600000  | 3.33610000  |
| C  | 7.96070000  | 8.45710000  | 2.79650000  |
| C  | 6.12390000  | 6.89280000  | 2.57490000  |
| C  | 7.47480000  | 7.20770000  | 2.39980000  |
| C  | 5.76840000  | 9.07790000  | 3.52380000  |
| Pt | 4.36930000  | 0.00000000  | 0.00000000  |
| S  | 6.64310000  | -0.19860000 | -0.45360000 |
| S  | 4.60540000  | -2.09090000 | -0.99070000 |
| N  | 7.19340000  | -2.56080000 | -1.64480000 |
| C  | 6.31410000  | -1.75560000 | -1.11770000 |
| C  | 8.61830000  | -2.23860000 | -1.67430000 |
| H  | 8.72820000  | -1.27410000 | -1.66630000 |
| H  | 9.00560000  | -2.57520000 | -2.49720000 |
| C  | 6.78200000  | -3.84850000 | -2.23900000 |
| H  | 6.06020000  | -4.22890000 | -1.71360000 |
| H  | 7.52780000  | -4.46730000 | -2.21400000 |
| C  | 9.36710000  | -2.83860000 | -0.48420000 |
| H  | 10.30130000 | -2.63210000 | -0.55660000 |
| H  | 9.24950000  | -3.79160000 | -0.48070000 |
| H  | 9.01970000  | -2.47020000 | 0.33150000  |
| C  | 6.32080000  | -3.67380000 | -3.67390000 |
| H  | 7.03720000  | -3.30830000 | -4.19740000 |
| H  | 5.56940000  | -3.07610000 | -3.69800000 |
| H  | 6.06330000  | -4.52490000 | -4.03390000 |
| S  | 2.09560000  | 0.19860000  | 0.45360000  |
| S  | 4.13330000  | 2.09090000  | 0.99070000  |
| N  | 1.54530000  | 2.56080000  | 1.64480000  |
| C  | 2.42460000  | 1.75560000  | 1.11770000  |
| C  | 0.12040000  | 2.23860000  | 1.67430000  |
| H  | 0.01050000  | 1.27410000  | 1.66630000  |
| H  | -0.26690000 | 2.57520000  | 2.49720000  |
| C  | 1.95670000  | 3.84850000  | 2.23900000  |
| H  | 2.67850000  | 4.22890000  | 1.71360000  |
| H  | 1.21090000  | 4.46730000  | 2.21400000  |
| C  | -0.62840000 | 2.83860000  | 0.48420000  |
| H  | -1.56260000 | 2.63210000  | 0.55660000  |
| H  | -0.51080000 | 3.79160000  | 0.48070000  |
| H  | -0.28100000 | 2.47020000  | -0.33150000 |
| C  | 2.41790000  | 3.67380000  | 3.67390000  |
| H  | 1.70150000  | 3.30830000  | 4.19740000  |
| H  | 3.16930000  | 3.07610000  | 3.69800000  |
| H  | 2.67540000  | 4.52490000  | 4.03390000  |

**Dimers of Fig. 7 (main text)**

## 1·FBrB

|    |             |             |             |
|----|-------------|-------------|-------------|
| Br | 7.53830000  | 8.85240000  | 6.94100000  |
| Br | 9.63840000  | 6.54700000  | 5.57770000  |
| F  | 3.82410000  | 5.32220000  | 6.30290000  |
| F  | 5.50270000  | 3.47280000  | 5.23070000  |
| F  | 4.75840000  | 7.71450000  | 7.07790000  |
| F  | 8.10590000  | 4.06220000  | 4.88030000  |
| C  | 5.61240000  | 6.83500000  | 6.53840000  |
| C  | 6.95590000  | 7.16040000  | 6.37970000  |
| C  | 5.12200000  | 5.60180000  | 6.14490000  |
| C  | 5.97070000  | 4.67000000  | 5.59550000  |
| C  | 7.80830000  | 6.21740000  | 5.81690000  |
| C  | 7.30620000  | 4.98070000  | 5.43240000  |
| Ni | 7.11150000  | 4.28800000  | 8.96280000  |
| S  | 4.94370000  | 4.42280000  | 9.36840000  |
| S  | 6.99570000  | 6.28260000  | 9.90420000  |
| N  | 4.42200000  | 6.78960000  | 10.56900000 |
| C  | 5.30210000  | 5.97110000  | 10.03120000 |
| C  | 5.29090000  | 7.88780000  | 12.59900000 |
| H  | 6.03250000  | 7.27820000  | 12.62770000 |
| H  | 4.56520000  | 7.53270000  | 13.11710000 |
| H  | 5.55830000  | 8.73520000  | 12.96200000 |
| C  | 2.98170000  | 6.47120000  | 10.60030000 |
| H  | 2.59920000  | 6.79250000  | 11.43210000 |
| H  | 2.86400000  | 5.50860000  | 10.56810000 |
| C  | 4.84340000  | 8.07150000  | 11.16140000 |
| H  | 4.10480000  | 8.69960000  | 11.13090000 |
| H  | 5.57350000  | 8.44320000  | 10.64160000 |
| C  | 2.24980000  | 7.10630000  | 9.43160000  |
| H  | 2.57450000  | 6.73250000  | 8.60970000  |
| H  | 2.40320000  | 8.05410000  | 9.43520000  |
| H  | 1.30890000  | 6.93450000  | 9.51220000  |
| S  | 9.27930000  | 4.15320000  | 8.55730000  |
| S  | 7.22740000  | 2.29330000  | 8.02150000  |
| N  | 9.80110000  | 1.78630000  | 7.35670000  |
| C  | 8.92100000  | 2.60490000  | 7.89450000  |
| C  | 8.93220000  | 0.68810000  | 5.32660000  |
| H  | 8.19060000  | 1.29770000  | 5.29790000  |
| H  | 9.65790000  | 1.04320000  | 4.80860000  |
| H  | 8.66480000  | -0.15930000 | 4.96360000  |
| C  | 11.24140000 | 2.10480000  | 7.32530000  |
| H  | 11.62390000 | 1.78340000  | 6.49360000  |
| H  | 11.35910000 | 3.06730000  | 7.35760000  |
| C  | 9.37960000  | 0.50440000  | 6.76420000  |
| H  | 10.11830000 | -0.12370000 | 6.79470000  |
| H  | 8.64960000  | 0.13270000  | 7.28410000  |
| C  | 11.97330000 | 1.46960000  | 8.49410000  |
| H  | 11.64860000 | 1.84350000  | 9.31600000  |
| H  | 11.81990000 | 0.52180000  | 8.49050000  |
| H  | 12.91420000 | 1.64140000  | 8.41340000  |

## 1·FIB

|    |            |             |            |
|----|------------|-------------|------------|
| I  | 9.50980000 | 9.11260000  | 1.15960000 |
| I  | 7.23460000 | 11.64080000 | 2.57220000 |
| F  | 4.39440000 | 10.30070000 | 2.62180000 |
| F  | 5.15740000 | 6.04640000  | 0.82080000 |
| F  | 3.47680000 | 7.90150000  | 1.85990000 |
| F  | 7.76730000 | 6.63240000  | 0.49080000 |
| C  | 6.59740000 | 9.75220000  | 1.94780000 |
| C  | 7.46370000 | 8.80080000  | 1.40000000 |
| C  | 5.26600000 | 9.42090000  | 2.09200000 |
| C  | 6.95790000 | 7.56540000  | 1.02320000 |
| C  | 4.77200000 | 8.18960000  | 1.71160000 |
| C  | 5.62790000 | 7.25360000  | 1.17390000 |
| Ni | 6.76610000 | 6.99700000  | 4.65100000 |
| S  | 6.89750000 | 5.01150000  | 3.69090000 |
| S  | 8.93970000 | 6.84720000  | 4.31350000 |
| N  | 9.48290000 | 4.51980000  | 3.05940000 |
| C  | 9.09030000 | 3.24240000  | 2.43060000 |
| H  | 8.33630000 | 2.86620000  | 2.91060000 |

|   |             |             |            |
|---|-------------|-------------|------------|
| H | 9.82750000  | 2.61510000  | 2.49020000 |
| C | 10.92080000 | 4.84900000  | 3.05480000 |
| H | 11.03060000 | 5.81280000  | 3.07620000 |
| H | 11.32420000 | 4.51870000  | 2.23710000 |
| C | 8.59290000  | 5.32030000  | 3.59990000 |
| C | 11.62750000 | 4.23230000  | 4.25290000 |
| H | 12.57270000 | 4.39180000  | 4.18410000 |
| H | 11.46300000 | 3.28680000  | 4.27060000 |
| H | 11.29490000 | 4.63000000  | 5.06030000 |
| C | 8.71240000  | 3.44310000  | 0.97210000 |
| H | 9.47640000  | 3.75850000  | 0.48370000 |
| H | 8.00420000  | 4.08730000  | 0.90970000 |
| H | 8.41840000  | 2.60780000  | 0.60000000 |
| S | 6.63460000  | 8.98250000  | 5.61120000 |
| S | 4.59240000  | 7.14680000  | 4.98850000 |
| N | 4.04920000  | 9.47420000  | 6.24260000 |
| C | 4.44180000  | 10.75160000 | 6.87140000 |
| H | 5.19580000  | 11.12780000 | 6.39140000 |
| H | 3.70460000  | 11.37880000 | 6.81190000 |
| C | 2.61130000  | 9.14500000  | 6.24720000 |
| H | 2.50150000  | 8.18120000  | 6.22580000 |
| H | 2.20790000  | 9.47520000  | 7.06490000 |
| C | 4.93920000  | 8.67370000  | 5.70210000 |
| C | 1.90460000  | 9.76160000  | 5.04910000 |
| H | 0.95940000  | 9.60220000  | 5.11800000 |
| H | 2.06910000  | 10.70710000 | 5.03150000 |
| H | 2.23720000  | 9.36390000  | 4.24170000 |
| C | 4.81970000  | 10.55080000 | 8.33000000 |
| H | 4.05570000  | 10.23540000 | 8.81830000 |
| H | 5.52790000  | 9.90660000  | 8.39230000 |
| H | 5.11370000  | 11.38610000 | 8.70210000 |

**2·FBrB**

|    |             |            |             |
|----|-------------|------------|-------------|
| Br | 7.40550000  | 8.93050000 | 6.93030000  |
| Br | 5.50350000  | 6.62360000 | 5.56870000  |
| F  | 4.62520000  | 7.78960000 | 7.08830000  |
| F  | 5.37190000  | 3.53470000 | 5.26000000  |
| F  | 3.69310000  | 5.39150000 | 6.31940000  |
| F  | 7.97250000  | 4.13080000 | 4.89430000  |
| C  | 5.48550000  | 6.90920000 | 6.54520000  |
| C  | 7.66170000  | 6.28870000 | 5.82280000  |
| C  | 7.17970000  | 5.05760000 | 5.43660000  |
| C  | 4.98760000  | 5.67430000 | 6.15710000  |
| C  | 6.81760000  | 7.23150000 | 6.38210000  |
| C  | 5.83810000  | 4.74260000 | 5.60680000  |
| Pd | 7.03090000  | 4.37060000 | 8.96240000  |
| S  | 4.75510000  | 4.56690000 | 9.41450000  |
| S  | 6.81130000  | 6.46490000 | 9.95570000  |
| N  | 4.23360000  | 6.92970000 | 10.59980000 |
| C  | 2.05950000  | 7.22240000 | 9.44360000  |
| H  | 2.41490000  | 6.85060000 | 8.60920000  |
| H  | 2.18770000  | 8.19360000 | 9.44900000  |
| H  | 1.10340000  | 7.01910000 | 9.51090000  |
| C  | 5.09770000  | 8.03630000 | 12.63690000 |
| H  | 5.85730000  | 7.41730000 | 12.66560000 |
| H  | 4.35980000  | 7.67360000 | 13.16930000 |
| H  | 5.36960000  | 8.90330000 | 13.00260000 |
| C  | 4.64200000  | 8.21510000 | 11.19130000 |
| H  | 3.88010000  | 8.84680000 | 11.16260000 |
| H  | 5.38120000  | 8.60220000 | 10.65890000 |
| C  | 2.79720000  | 6.60410000 | 10.63200000 |
| H  | 2.40250000  | 6.94270000 | 11.47450000 |
| H  | 2.68270000  | 5.62090000 | 10.61410000 |
| C  | 5.11180000  | 6.11900000 | 10.07550000 |
| S  | 9.30670000  | 4.17430000 | 8.51020000  |
| S  | 7.25050000  | 2.27630000 | 7.96900000  |
| N  | 9.82820000  | 1.81140000 | 7.32490000  |
| C  | 12.00230000 | 1.51880000 | 8.48110000  |
| H  | 11.64690000 | 1.89060000 | 9.31550000  |

|   |             |             |            |
|---|-------------|-------------|------------|
| H | 11.87410000 | 0.54760000  | 8.47570000 |
| H | 12.95840000 | 1.72210000  | 8.41390000 |
| C | 8.96410000  | 0.70480000  | 5.28780000 |
| H | 8.20450000  | 1.32390000  | 5.25910000 |
| H | 9.70200000  | 1.06750000  | 4.75540000 |
| H | 8.69220000  | -0.16210000 | 4.92210000 |
| C | 9.41980000  | 0.52610000  | 6.73340000 |
| H | 10.18170000 | -0.10570000 | 6.76210000 |
| H | 8.68060000  | 0.13900000  | 7.26580000 |
| C | 11.26460000 | 2.13710000  | 7.29270000 |
| H | 11.65930000 | 1.79840000  | 6.45020000 |
| H | 11.37910000 | 3.12030000  | 7.31060000 |
| C | 8.95000000  | 2.62210000  | 7.84920000 |

### 3·FBrB

|    |             |             |             |
|----|-------------|-------------|-------------|
| Br | 5.53820000  | 5.19250000  | 2.01970000  |
| Br | 3.44010000  | 7.50390000  | 3.37680000  |
| F  | 9.25580000  | 8.72910000  | 2.62760000  |
| F  | 8.31970000  | 6.33650000  | 1.86550000  |
| F  | 4.97510000  | 9.99080000  | 4.05710000  |
| F  | 7.57390000  | 10.58990000 | 3.68990000  |
| C  | 5.26850000  | 7.82850000  | 3.12710000  |
| C  | 7.10770000  | 9.37600000  | 3.33610000  |
| C  | 7.96070000  | 8.45710000  | 2.79650000  |
| C  | 6.12390000  | 6.89280000  | 2.57490000  |
| C  | 7.47480000  | 7.20770000  | 2.39980000  |
| C  | 5.76840000  | 9.07790000  | 3.52380000  |
| Pt | 5.86360000  | 9.78220000  | 0.00000000  |
| S  | 8.13740000  | 9.58360000  | -0.45360000 |
| S  | 6.09970000  | 7.69130000  | -0.99070000 |
| N  | 8.68770000  | 7.22140000  | -1.64480000 |
| C  | 7.80830000  | 8.02660000  | -1.11770000 |
| C  | 10.11260000 | 7.54360000  | -1.67430000 |
| H  | 10.22240000 | 8.50810000  | -1.66630000 |
| H  | 10.49990000 | 7.20700000  | -2.49720000 |
| C  | 8.27630000  | 5.93370000  | -2.23900000 |
| H  | 7.55450000  | 5.55340000  | -1.71360000 |
| H  | 9.02210000  | 5.31490000  | -2.21400000 |
| C  | 10.86140000 | 6.94370000  | -0.48420000 |
| H  | 11.79560000 | 7.15010000  | -0.55660000 |
| H  | 10.74370000 | 5.99070000  | -0.48070000 |
| H  | 10.51400000 | 7.31200000  | 0.33150000  |
| C  | 7.81510000  | 6.10840000  | -3.67390000 |
| H  | 8.53150000  | 6.47400000  | -4.19740000 |
| H  | 7.06360000  | 6.70610000  | -3.69800000 |
| H  | 7.55750000  | 5.25730000  | -4.03390000 |
| S  | 3.58980000  | 9.98080000  | 0.45360000  |
| S  | 5.62760000  | 11.87310000 | 0.99070000  |
| N  | 3.03960000  | 12.34300000 | 1.64480000  |
| C  | 3.91890000  | 11.53790000 | 1.11770000  |
| C  | 1.61470000  | 12.02090000 | 1.67430000  |
| H  | 1.50480000  | 11.05630000 | 1.66630000  |
| H  | 1.22740000  | 12.35750000 | 2.49720000  |
| C  | 3.45090000  | 13.63080000 | 2.23900000  |
| H  | 4.17270000  | 14.01110000 | 1.71360000  |
| H  | 2.70520000  | 14.24950000 | 2.21400000  |
| C  | 0.86580000  | 12.62080000 | 0.48420000  |
| H  | -0.06830000 | 12.41440000 | 0.55660000  |
| H  | 0.98350000  | 13.57380000 | 0.48070000  |
| H  | 1.21320000  | 12.25240000 | -0.33150000 |
| C  | 3.91220000  | 13.45610000 | 3.67390000  |
| H  | 3.19570000  | 13.09050000 | 4.19740000  |
| H  | 4.66360000  | 12.85840000 | 3.69800000  |
| H  | 4.16970000  | 14.30710000 | 4.03390000  |

### TRIMERS

#### 1·2 (FBrB)

|    |             |             |             |
|----|-------------|-------------|-------------|
| Ni | 4.370500000 | 0.000000000 | 0.000000000 |
| S  | 2.202700000 | 0.134800000 | 0.405600000 |

|                  |              |              |              |
|------------------|--------------|--------------|--------------|
| S                | 4.254700000  | 1.994700000  | 0.941400000  |
| N                | 1.681000000  | 2.501700000  | 1.606100000  |
| C                | 2.561000000  | 1.683100000  | 1.068400000  |
| C                | 2.549900000  | 3.599900000  | 3.636200000  |
| H                | 3.291500000  | 2.990300000  | 3.664900000  |
| H                | 1.824200000  | 3.244800000  | 4.154300000  |
| H                | 2.817300000  | 4.447300000  | 3.999200000  |
| C                | 0.240600000  | 2.183200000  | 1.637500000  |
| H                | -0.141800000 | 2.504500000  | 2.469300000  |
| H                | 0.122900000  | 1.220700000  | 1.605200000  |
| C                | 2.102400000  | 3.783600000  | 2.198600000  |
| H                | 1.363700000  | 4.411700000  | 2.168100000  |
| H                | 2.832400000  | 4.155300000  | 1.678700000  |
| C                | -0.491200000 | 2.818300000  | 0.468800000  |
| H                | -0.166600000 | 2.444500000  | -0.353100000 |
| H                | -0.337800000 | 3.766200000  | 0.472300000  |
| H                | -1.432200000 | 2.646600000  | 0.549400000  |
| S                | 6.538300000  | -0.134800000 | -0.405600000 |
| S                | 4.486300000  | -1.994700000 | -0.941400000 |
| N                | 7.060000000  | -2.501700000 | -1.606100000 |
| C                | 6.180000000  | -1.683100000 | -1.068400000 |
| C                | 6.191100000  | -3.599900000 | -3.636200000 |
| H                | 5.449500000  | -2.990300000 | -3.664900000 |
| H                | 6.916800000  | -3.244800000 | -4.154300000 |
| H                | 5.923700000  | -4.447300000 | -3.999200000 |
| C                | 8.500400000  | -2.183200000 | -1.637500000 |
| H                | 8.882800000  | -2.504500000 | -2.469300000 |
| H                | 8.618100000  | -1.220700000 | -1.605200000 |
| C                | 6.638600000  | -3.783600000 | -2.198600000 |
| H                | 7.377300000  | -4.411700000 | -2.168100000 |
| H                | 5.908600000  | -4.155300000 | -1.678700000 |
| C                | 9.232200000  | -2.818300000 | -0.468800000 |
| H                | 8.907600000  | -2.444500000 | 0.353100000  |
| H                | 9.078800000  | -3.766200000 | -0.472300000 |
| H                | 10.173200000 | -2.646600000 | -0.549400000 |
| Br               | 4.797200000  | 4.564400000  | -2.021800000 |
| Br               | 6.897400000  | 2.259000000  | -3.385100000 |
| F                | 1.083000000  | 1.034200000  | -2.659900000 |
| F                | 2.761600000  | -0.815200000 | -3.732100000 |
| F                | 2.017300000  | 3.426500000  | -1.884900000 |
| F                | 5.364900000  | -0.225700000 | -4.082600000 |
| C                | 2.871300000  | 2.547000000  | -2.424400000 |
| C                | 4.214800000  | 2.872500000  | -2.583100000 |
| C                | 2.381000000  | 1.313800000  | -2.817900000 |
| C                | 3.229600000  | 0.382100000  | -3.367300000 |
| C                | 5.067200000  | 1.929400000  | -3.146000000 |
| C                | 4.565100000  | 0.692700000  | -3.530500000 |
| Br               | 3.943800000  | -4.564400000 | 2.021800000  |
| Br               | 1.843600000  | -2.259000000 | 3.385100000  |
| F                | 7.658000000  | -1.034200000 | 2.659900000  |
| F                | 5.979400000  | 0.815200000  | 3.732100000  |
| F                | 6.723700000  | -3.426500000 | 1.884900000  |
| F                | 3.376100000  | 0.225700000  | 4.082600000  |
| C                | 5.869700000  | -2.547000000 | 2.424400000  |
| C                | 4.526200000  | -2.872500000 | 2.583100000  |
| C                | 6.360000000  | -1.313800000 | 2.817900000  |
| C                | 5.511400000  | -0.382100000 | 3.367300000  |
| C                | 3.673800000  | -1.929400000 | 3.146000000  |
| C                | 4.175900000  | -0.692700000 | 3.530500000  |
| <b>1·2 (FIB)</b> |              |              |              |
| I                | 9.509800000  | 9.112600000  | 1.159600000  |
| I                | 7.234600000  | 11.640800000 | 2.572200000  |
| F                | 4.394400000  | 10.300700000 | 2.621800000  |
| F                | 5.157400000  | 6.046400000  | 0.820800000  |
| F                | 3.476800000  | 7.901500000  | 1.859900000  |
| F                | 7.767300000  | 6.632400000  | 0.490800000  |
| C                | 6.597400000  | 9.752200000  | 1.947800000  |
| C                | 7.463700000  | 8.800800000  | 1.400000000  |
| C                | 5.266000000  | 9.420900000  | 2.092000000  |
| C                | 6.957900000  | 7.565400000  | 1.023200000  |
| C                | 4.772000000  | 8.189600000  | 1.711600000  |

|    |              |              |             |
|----|--------------|--------------|-------------|
| C  | 5.627900000  | 7.253600000  | 1.173900000 |
| Ni | 6.766100000  | 6.997000000  | 4.651000000 |
| S  | 6.897500000  | 5.011500000  | 3.690900000 |
| S  | 8.939700000  | 6.847200000  | 4.313500000 |
| N  | 9.482900000  | 4.519800000  | 3.059400000 |
| C  | 9.090300000  | 3.242400000  | 2.430600000 |
| H  | 8.336300000  | 2.866200000  | 2.910600000 |
| H  | 9.827500000  | 2.615100000  | 2.490200000 |
| C  | 10.920800000 | 4.849000000  | 3.054800000 |
| H  | 11.030600000 | 5.812800000  | 3.076200000 |
| H  | 11.324200000 | 4.518700000  | 2.237100000 |
| C  | 8.592900000  | 5.320300000  | 3.599900000 |
| C  | 11.627500000 | 4.232300000  | 4.252900000 |
| H  | 12.572700000 | 4.391800000  | 4.184100000 |
| H  | 11.463000000 | 3.286800000  | 4.270600000 |
| H  | 11.294900000 | 4.630000000  | 5.060300000 |
| C  | 8.712400000  | 3.443100000  | 0.972100000 |
| H  | 9.476400000  | 3.758500000  | 0.483700000 |
| H  | 8.004200000  | 4.087300000  | 0.909700000 |
| H  | 8.418400000  | 2.607800000  | 0.600000000 |
| S  | 6.634600000  | 8.982500000  | 5.611200000 |
| S  | 4.592400000  | 7.146800000  | 4.988500000 |
| N  | 4.049200000  | 9.474200000  | 6.242600000 |
| C  | 4.441800000  | 10.751600000 | 6.871400000 |
| H  | 5.195800000  | 11.127800000 | 6.391400000 |
| H  | 3.704600000  | 11.378800000 | 6.811900000 |
| C  | 2.611300000  | 9.145000000  | 6.247200000 |
| H  | 2.501500000  | 8.181200000  | 6.225800000 |
| H  | 2.207900000  | 9.475200000  | 7.064900000 |
| C  | 4.939200000  | 8.673700000  | 5.702100000 |
| C  | 1.904600000  | 9.761600000  | 5.049100000 |
| H  | 0.959400000  | 9.602200000  | 5.118000000 |
| H  | 2.069100000  | 10.707100000 | 5.031500000 |
| H  | 2.237200000  | 9.363900000  | 4.241700000 |
| C  | 4.819700000  | 10.550800000 | 8.330000000 |
| H  | 4.055700000  | 10.235400000 | 8.818300000 |
| H  | 5.527900000  | 9.906600000  | 8.392300000 |
| H  | 5.113700000  | 11.386100000 | 8.702100000 |
| I  | 4.022300000  | 4.881400000  | 8.142400000 |
| I  | 6.297500000  | 2.353200000  | 6.729800000 |
| F  | 9.137700000  | 3.693200000  | 6.680300000 |
| F  | 8.374700000  | 7.947500000  | 8.481200000 |
| F  | 10.055300000 | 6.092400000  | 7.442100000 |
| F  | 5.764800000  | 7.361500000  | 8.811300000 |
| C  | 6.934700000  | 4.241800000  | 7.354200000 |
| C  | 6.068400000  | 5.193200000  | 7.902100000 |
| C  | 8.266100000  | 4.573000000  | 7.210000000 |
| C  | 6.574200000  | 6.428500000  | 8.278800000 |
| C  | 8.760100000  | 5.804400000  | 7.590500000 |
| C  | 7.904200000  | 6.740400000  | 8.128100000 |

**2·2 (FBrB)**

|    |              |             |              |
|----|--------------|-------------|--------------|
| Pd | 4.364900000  | 0.000000000 | 0.000000000  |
| S  | 2.089100000  | 0.196300000 | 0.452200000  |
| S  | 4.145300000  | 2.094300000 | 0.993400000  |
| N  | 1.567600000  | 2.559200000 | 1.637400000  |
| C  | -0.606500000 | 2.851800000 | 0.481300000  |
| H  | -0.251100000 | 2.480000000 | -0.353100000 |
| H  | -0.478300000 | 3.823000000 | 0.486700000  |
| H  | -1.562600000 | 2.648500000 | 0.548500000  |
| C  | 2.431700000  | 3.665700000 | 3.674600000  |
| H  | 3.191300000  | 3.046700000 | 3.703200000  |
| H  | 1.693800000  | 3.303000000 | 4.206900000  |
| H  | 2.703600000  | 4.532700000 | 4.040200000  |
| C  | 1.976000000  | 3.844500000 | 2.228900000  |
| H  | 1.214100000  | 4.476300000 | 2.200300000  |
| H  | 2.715200000  | 4.231600000 | 1.696600000  |
| C  | 0.131200000  | 2.233500000 | 1.669700000  |
| H  | -0.263500000 | 2.572100000 | 2.512100000  |
| H  | 0.016700000  | 1.250300000 | 1.651800000  |
| C  | 2.445800000  | 1.748500000 | 1.113100000  |



|    |              |              |              |
|----|--------------|--------------|--------------|
| S  | 6.640700000  | -0.196300000 | -0.452200000 |
| S  | 4.584500000  | -2.094300000 | -0.993400000 |
| N  | 7.162200000  | -2.559200000 | -1.637400000 |
| C  | 9.336300000  | -2.851800000 | -0.481300000 |
| H  | 8.980900000  | -2.480000000 | 0.353100000  |
| H  | 9.208100000  | -3.823000000 | -0.486700000 |
| H  | 10.292400000 | -2.648500000 | -0.548500000 |
| C  | 6.298100000  | -3.665700000 | -3.674600000 |
| H  | 5.538500000  | -3.046700000 | -3.703200000 |
| H  | 7.036000000  | -3.303000000 | -4.206900000 |
| H  | 6.026200000  | -4.532700000 | -4.040200000 |
| C  | 6.753800000  | -3.844500000 | -2.228900000 |
| H  | 7.515700000  | -4.476300000 | -2.200300000 |
| H  | 6.014600000  | -4.231600000 | -1.696600000 |
| C  | 8.598600000  | -2.233500000 | -1.669700000 |
| H  | 8.993300000  | -2.572100000 | -2.512100000 |
| H  | 8.713100000  | -1.250300000 | -1.651800000 |
| C  | 6.284000000  | -1.748500000 | -1.113100000 |
| Br | 3.990300000  | -4.560000000 | 2.032000000  |
| Br | 1.892300000  | -2.253000000 | 3.393700000  |
| F  | 6.770600000  | -3.419000000 | 1.874000000  |
| F  | 6.023900000  | 0.835900000  | 3.702300000  |
| F  | 7.702700000  | -1.020900000 | 2.643000000  |
| F  | 3.423300000  | 0.239700000  | 4.068000000  |
| C  | 5.910300000  | -2.538600000 | 2.417100000  |
| C  | 3.734100000  | -1.918100000 | 3.139500000  |
| C  | 4.216200000  | -0.687000000 | 3.525800000  |
| C  | 6.408200000  | -1.303700000 | 2.805200000  |
| C  | 4.578200000  | -2.861000000 | 2.580300000  |
| C  | 5.557700000  | -0.372100000 | 3.355500000  |
| Br | 4.739500000  | 4.560000000  | -2.032000000 |
| Br | 6.837500000  | 2.253000000  | -3.393700000 |
| F  | 1.959200000  | 3.419000000  | -1.874000000 |
| F  | 2.705900000  | -0.835900000 | -3.702300000 |
| F  | 1.027100000  | 1.020900000  | -2.643000000 |
| F  | 5.306500000  | -0.239700000 | -4.068000000 |
| C  | 2.819500000  | 2.538600000  | -2.417100000 |
| C  | 4.995700000  | 1.918100000  | -3.139500000 |
| C  | 4.513600000  | 0.687000000  | -3.525800000 |
| C  | 2.321600000  | 1.303700000  | -2.805200000 |
| C  | 4.151600000  | 2.861000000  | -2.580300000 |
| C  | 3.172100000  | 0.372100000  | -3.355500000 |

### 3•2 (FBrB)

|    |              |              |              |
|----|--------------|--------------|--------------|
| Pt | 8.586000000  | 14.127600000 | 8.934500000  |
| S  | 10.859800000 | 13.929000000 | 8.480900000  |
| S  | 8.822100000  | 12.036700000 | 7.943800000  |
| N  | 11.410100000 | 11.566800000 | 7.289600000  |
| C  | 10.530800000 | 12.372000000 | 7.816800000  |
| C  | 12.835000000 | 11.889000000 | 7.260100000  |
| H  | 12.944800000 | 12.853500000 | 7.268200000  |
| H  | 13.222300000 | 11.552400000 | 6.437300000  |
| C  | 10.998700000 | 10.279100000 | 6.695500000  |
| H  | 10.276900000 | 9.898800000  | 7.220800000  |
| H  | 11.744500000 | 9.660300000  | 6.720500000  |
| C  | 13.583800000 | 11.289100000 | 8.450200000  |
| H  | 14.518000000 | 11.495500000 | 8.377900000  |
| H  | 13.466200000 | 10.336100000 | 8.453800000  |
| H  | 13.236400000 | 11.657400000 | 9.265900000  |
| C  | 10.537500000 | 10.453800000 | 5.260600000  |
| H  | 11.253900000 | 10.819400000 | 4.737100000  |
| H  | 9.786100000  | 11.051500000 | 5.236500000  |
| H  | 10.280000000 | 9.602700000  | 4.900600000  |
| S  | 6.312300000  | 14.326200000 | 9.388100000  |
| S  | 8.350000000  | 16.218500000 | 9.925100000  |
| N  | 5.762000000  | 16.688400000 | 10.579300000 |
| C  | 6.641300000  | 15.883300000 | 10.052200000 |
| C  | 4.337100000  | 16.366300000 | 10.608800000 |
| H  | 4.227200000  | 15.401700000 | 10.600700000 |
| H  | 3.949800000  | 16.702900000 | 11.431700000 |
| C  | 6.173400000  | 17.976200000 | 11.173400000 |

|    |              |              |              |
|----|--------------|--------------|--------------|
| H  | 6.895100000  | 18.356500000 | 10.648100000 |
| H  | 5.427600000  | 18.594900000 | 11.148400000 |
| C  | 3.588300000  | 16.966200000 | 9.418700000  |
| H  | 2.654100000  | 16.759800000 | 9.491100000  |
| H  | 3.705900000  | 17.919200000 | 9.415100000  |
| H  | 3.935700000  | 16.597800000 | 8.603000000  |
| C  | 6.634600000  | 17.801500000 | 12.608300000 |
| H  | 5.918200000  | 17.435900000 | 13.131900000 |
| H  | 7.386000000  | 17.203800000 | 12.632400000 |
| H  | 6.892100000  | 18.652500000 | 12.968400000 |
| Br | 8.260700000  | 9.537900000  | 10.954200000 |
| Br | 6.162500000  | 11.849300000 | 12.311200000 |
| F  | 11.978200000 | 13.074500000 | 11.562100000 |
| F  | 11.042100000 | 10.681900000 | 10.800000000 |
| F  | 7.697500000  | 14.336200000 | 12.991600000 |
| F  | 10.296300000 | 14.935300000 | 12.624400000 |
| C  | 7.990900000  | 12.173900000 | 12.061500000 |
| C  | 9.830100000  | 13.721400000 | 12.270600000 |
| C  | 10.683100000 | 12.802500000 | 11.731000000 |
| C  | 8.846300000  | 11.238200000 | 11.509400000 |
| C  | 10.197200000 | 11.553100000 | 11.334300000 |
| C  | 8.490800000  | 13.423300000 | 12.458200000 |
| Br | 8.911400000  | 18.717400000 | 6.914700000  |
| Br | 11.009500000 | 16.406000000 | 5.557700000  |
| F  | 5.193900000  | 15.180800000 | 6.306800000  |
| F  | 6.130000000  | 17.573400000 | 7.069000000  |
| F  | 9.474600000  | 13.919100000 | 4.877300000  |
| F  | 6.875800000  | 13.320000000 | 5.244500000  |
| C  | 9.181100000  | 16.081400000 | 5.807400000  |
| C  | 7.342000000  | 14.533900000 | 5.598300000  |
| C  | 6.489000000  | 15.452700000 | 6.138000000  |
| C  | 8.325800000  | 17.017100000 | 6.359600000  |
| C  | 6.974900000  | 16.702200000 | 6.534700000  |
| C  | 8.681300000  | 14.832000000 | 5.410700000  |
